# Supplementary material for: Efficient in situ generation of H2O2 by novel magnesium–carbon nanotube composites
Source: Royal Society of Chemistry journal article supplement (doi:10.1039/c8ra05907a), 2018-01-01
Supplement: c8ra05907a1.pdf [file c8ra05907a1.pdf]

Supplementary Information

**Efficient *in-situ* Generation of H<sub>2</sub>O<sub>2</sub> by Novel Magnesium-Carbon Nanotubes**

**Composites**

Zhao Yang <sup>a</sup>, Xiao-bo Gong<sup>\*a, b</sup>, Bingqing Wang <sup>a</sup>, Dan Yang <sup>a</sup>, Tao Fu <sup>a</sup>, Yong Liu<sup>\*a</sup>,

b

<sup>a</sup> College of Chemistry and Material Science, Sichuan Normal University, Chengdu,  
Sichuan 610066, China

<sup>b</sup> Key Laboratory of Treatment for Special Wastewater Treatment of Sichuan Province  
Higher Education System, Chengdu, Sichuan 610066, China

\*Corresponding authors:

Jingan Road 5<sup>#</sup>, Jinjiang District, Chengdu, Sichuan, 610066, China.

Tel: +86-028-84760802

E-mail: gxb@sicnu.edu.cn (X.-b. Gong); 1031248534@qq.com (Y. Liu)

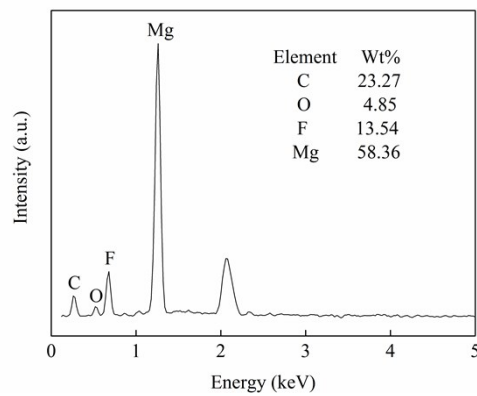

**Fig. S1** EDS spectrum of Mg-CNTs prepared with PVDF.

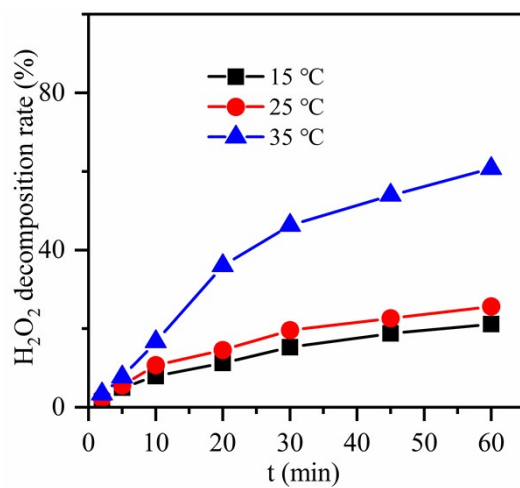

**Fig. S2** The effect of Mg-CNTs composite on H<sub>2</sub>O<sub>2</sub> decomposition at different temperature.

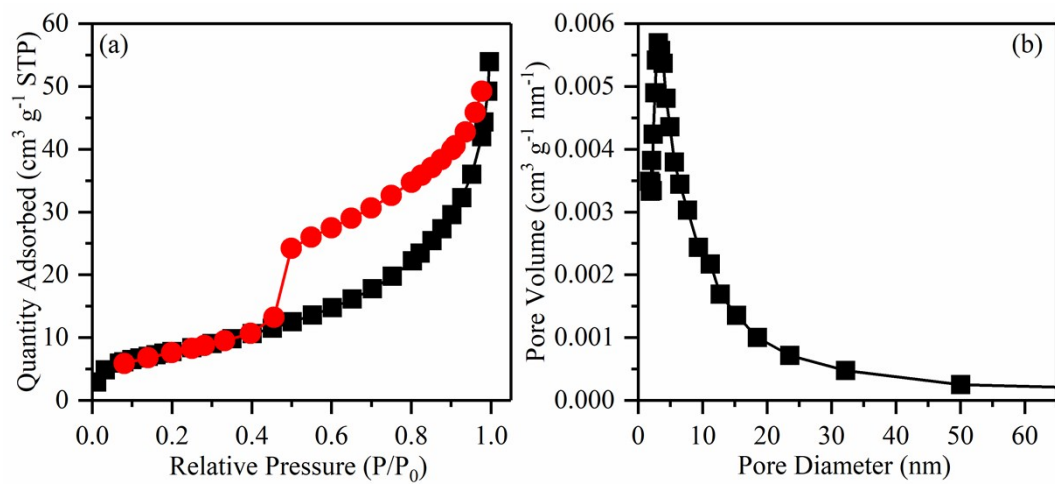

**Fig. S3** (a) Nitrogen adsorption/desorption isotherms and (b) pore distribution of Mg-CNTs after in-situ generation of H<sub>2</sub>O<sub>2</sub>.
